# Supplementary material for: Acquisition of the T790M resistance mutation during afatinib treatment in EGFR tyrosine kinase inhibitor–naïve patients with non–small cell lung cancer harboring EGFR mutations
Source: PubMed Central journal article supplement (PMC5620242; doi:10.18632/oncotarget.19243), 2017-07-12
Supplement: oncotarget-08-68123-s001.pdf [file oncotarget-08-68123-s001.pdf]

# Acquisition of the T790M resistance mutation during afatinib treatment in EGFR tyrosine kinase inhibitor-naïve patients with non-small cell lung cancer harboring EGFR mutations

## SUPPLEMENTARY MATERIALS

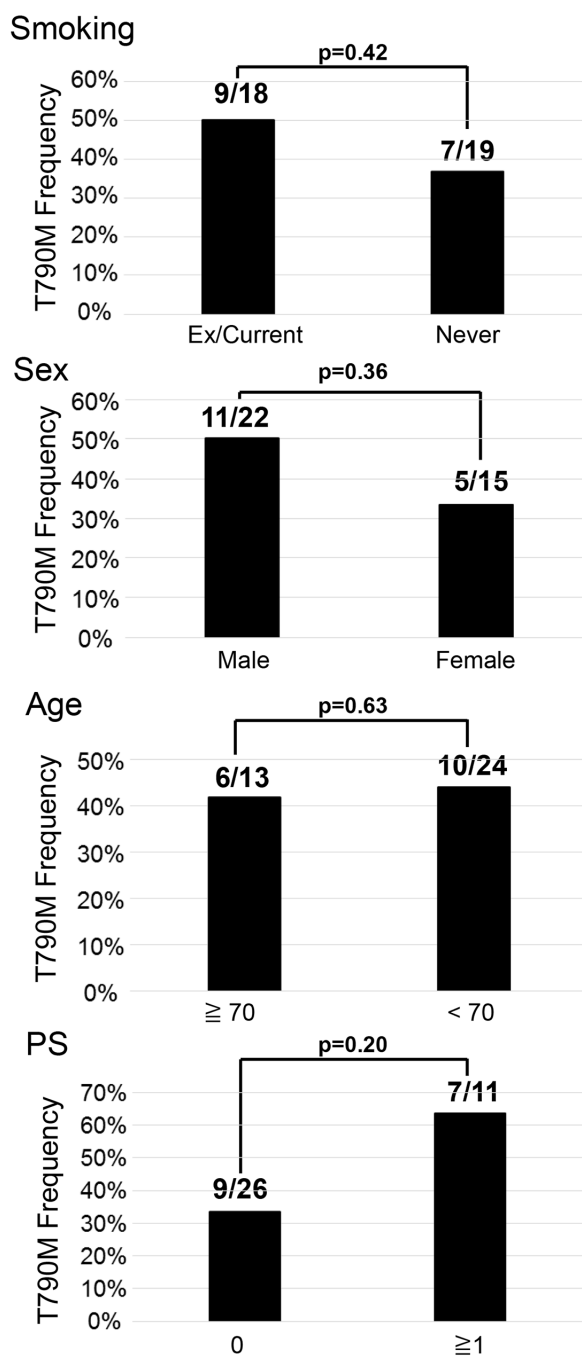

Supplementary Figure 1: Relation of patient characteristics (smoking status, sex, age, and PS) to the emergence of T790M. P values were calculated with the chi-square test.

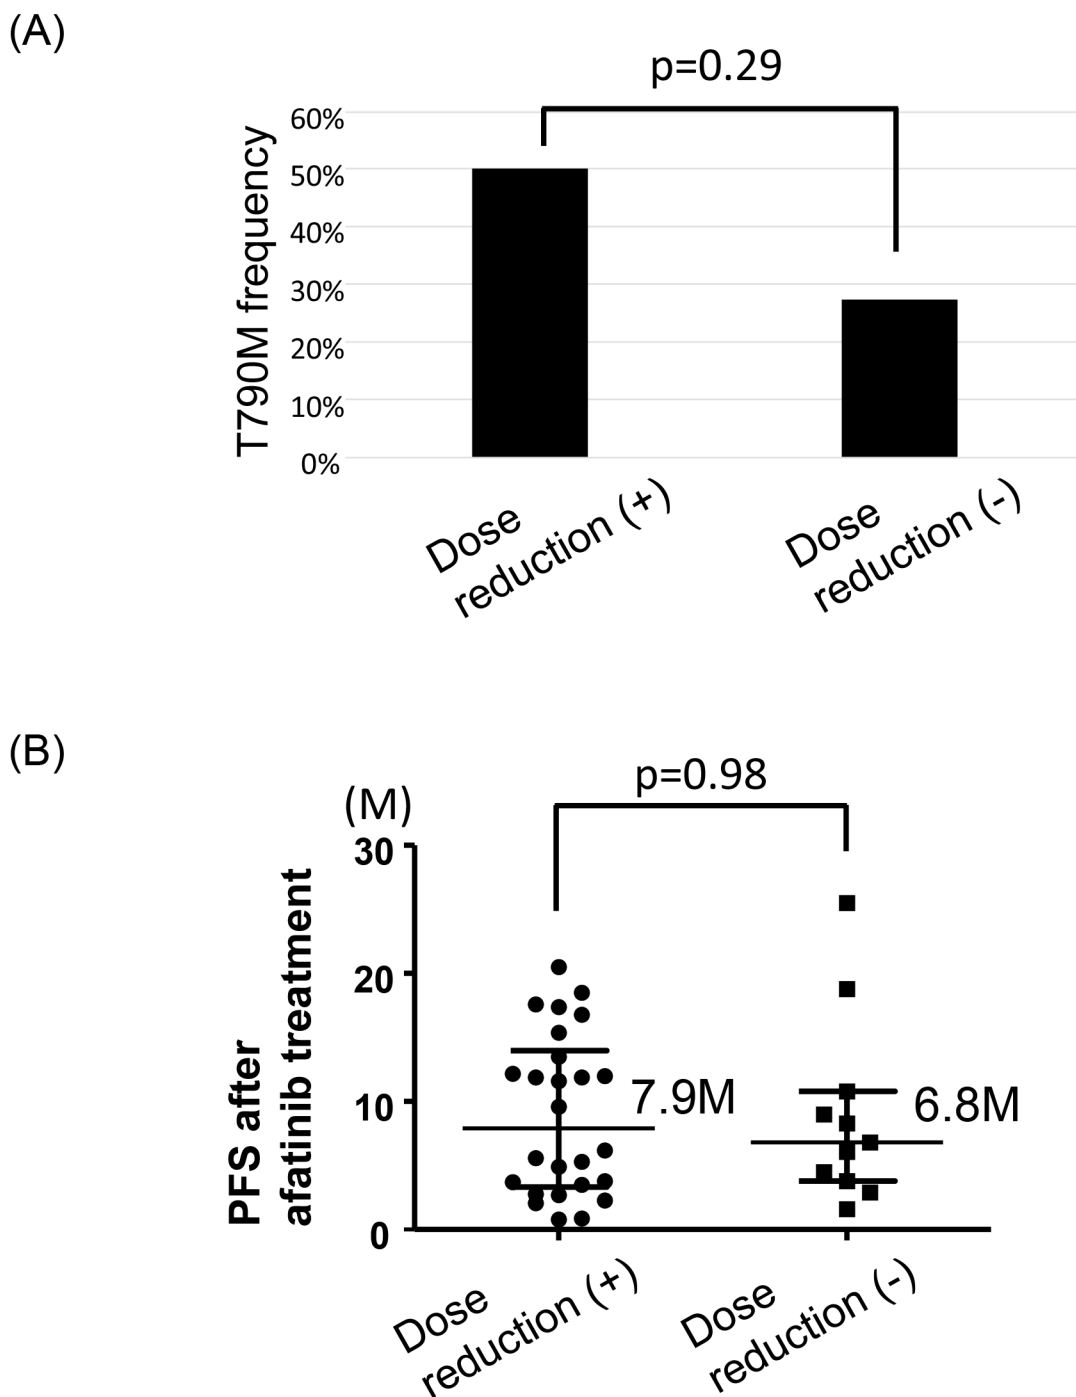

**Supplementary Figure 2:** Relation of dose reduction for afatinib to the emergence of T790M (A) or to PFS after the onset of afatinib treatment (B). Error bars in (B) indicate median  $\pm$  quartile deviation. The P values were calculated with the chi-square test (A) or Student's t test (B).
